# Supplementary material
Source: publisher figshare collection journal article supplement (https://tandf.figshare.com/articles/dataset/_/12103419)
Supplement: Supplementary file 1 [file 1]

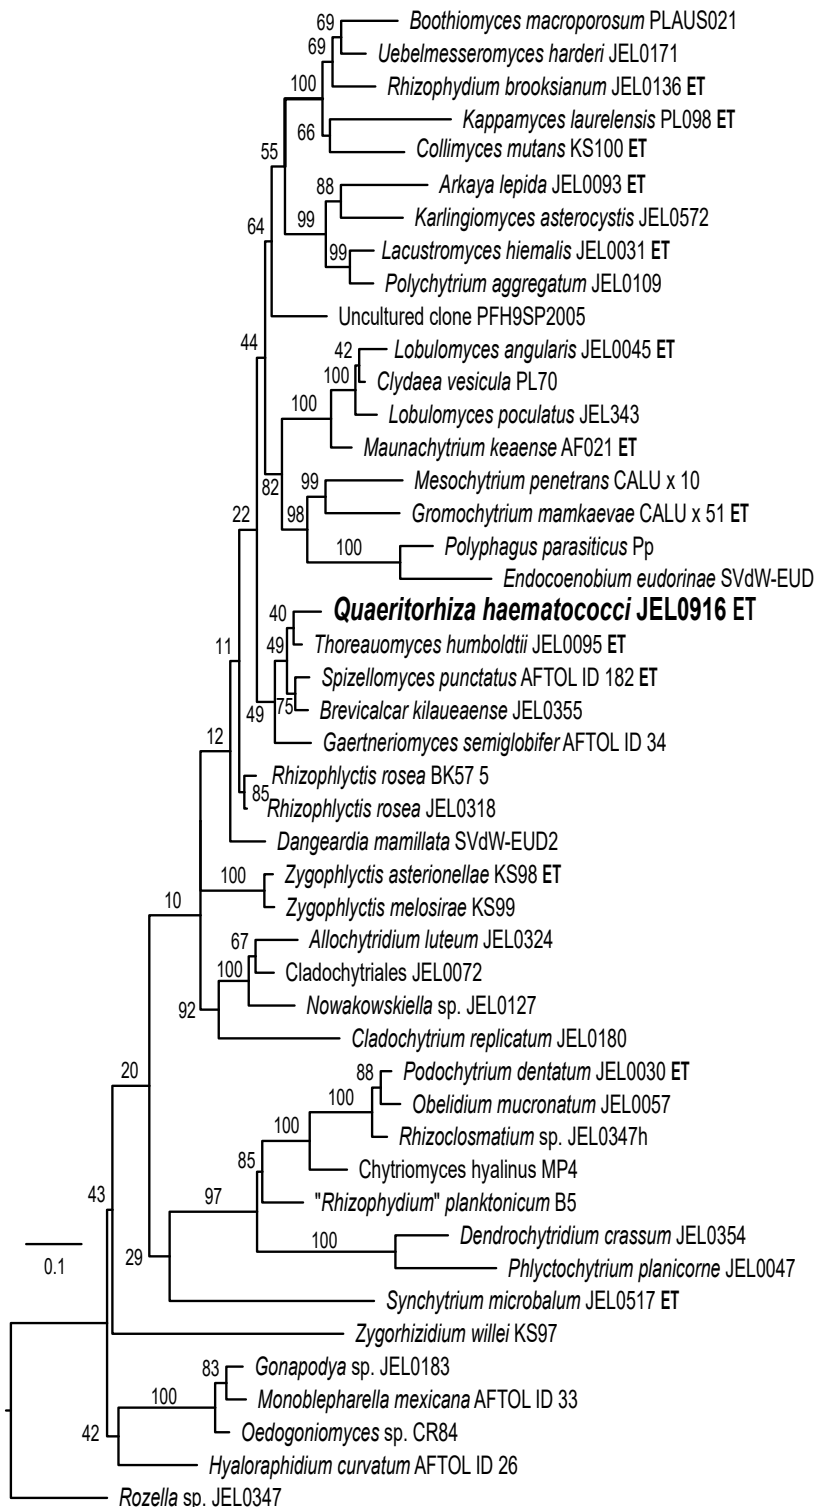

**Rhizophydiales**

**Polychytriales**

**Incertae sedis**

**Lobulomycetales**

**Mesochytriales**

**Gromochytriales**

**Polyphagales**

**Incertae sedis**

**Incertae sedis**

**Spizellomycetales**

**Rhizophlyctidales**

**Incertae sedis**

**Zygophlyctidales**

**Cladochytriales**

**Chytridiales**

**Synchytriales**

**Zygorhizidiales**

**Monoblepharidiales**

**Cryptomycota**
